# Supplementary material
Source: PubMed Central journal article supplement (PMC10376560)
Supplement: lvad073_supplementary_data.pdf [file lvad073_supplementary_data.pdf]

**Appendix Table 1.** Clinical disease severity score for hypercortisolism.

|                         | <b>Clinical Characteristic</b>                                          | <b>Points Assigned</b> |
|-------------------------|-------------------------------------------------------------------------|------------------------|
|                         | Hypertension                                                            | 1                      |
|                         | Pre-diabetes or type 2 diabetes mellitus                                | 1                      |
| Metabolic Abnormalities | Osteopenia                                                              | 1                      |
|                         | Osteoporosis by BMD and/or fragility fracture within the past 12 months | 2                      |
|                         | DVT/PE within the past 12 months                                        | 3                      |
|                         | Weight gain                                                             | 1                      |
|                         | Central obesity                                                         | 1                      |
|                         | Supraclavicular and/or dorsocervical fat accumulation                   | 3                      |
| Physical Exam Features  | Rounding of the face with or without plethora                           | 3                      |
|                         | Skin changes (i.e., violaceous striae, skin thinning, and/or bruising)  | 3                      |
|                         | Proximal muscle weakness                                                | 4                      |

Abbreviations: BMD, bone mineral density; DVT, deep venous thrombosis; PE, pulmonary embolism.

The clinical disease severity score was calculated for each patient prior to surgical treatment for hypercortisolism. A total sum score of 1-8 points was considered mild, 9-14 points moderate, and 15-22 points severe clinical disease.

*Appendix Table 2.* Biochemical disease severity score for hypercortisolism.

| Test*                         | Reference range              | ACTH-dependent hypercortisolism |        | ACTH-independent hypercortisolism    |        |
|-------------------------------|------------------------------|---------------------------------|--------|--------------------------------------|--------|
|                               |                              | Result                          | Points | Result                               | Points |
| Post 1-mg DST serum cortisol  | ≤ 1.8 µg/dL                  | ≤ 1.8                           | 0      | ≤ 1.8                                | 0      |
|                               |                              | 1.8 - 3                         | 1      | 1.8 - 3                              | 1      |
|                               |                              | 3 - 5                           | 2      | 3 - 5                                | 2      |
|                               |                              | 5 - 10                          | 3      | 5 - 10                               | 3      |
|                               |                              | > 10                            | 4      | > 10                                 | 4      |
| 24-hour urinary free cortisol | 3.5 - 45 µg/24h              | < 45                            | 0      | < 45                                 | 0      |
|                               |                              | 45 - 100                        | 2      | 45 - 100                             | 2      |
|                               |                              | 100 - 200                       | 3      | 100 - 200                            | 3      |
|                               |                              | 200 - 300                       | 4      | 200 - 300                            | 4      |
|                               |                              | 300 - 500                       | 5      | 300-500                              | 5      |
| Late night salivary cortisol  | < 50 ng/dL                   | > 500                           | 7      | > 500                                | 7      |
|                               |                              | 50 - 100                        | 1      | 50 - 100                             | 1      |
|                               |                              | 100 - 300                       | 3      | 100 - 300                            | 3      |
| ACTH                          | 10 - 60 pg/dL                | > 300                           | 4      | > 300                                | 4      |
|                               |                              | -                               | -      | > 15                                 | 0      |
|                               |                              | -                               | -      | 5 - 15                               | 1      |
| DHEA-S                        | Sex- and age-dependent µg/dL | -                               | -      | < 5                                  | 2      |
|                               |                              | -                               | -      | < 40 (if man or premenopausal woman) | 1      |
|                               |                              | -                               | -      | < 25 (if postmenopausal woman)       | 1      |
|                               |                              |                                 |        | < 15 (any sex and age)               | 2      |

Abbreviations: ACTH, corticotropin; DHEA-S, dehydroepiandrosterone sulfate; DST, dexamethasone suppression test.

\*The biochemical disease severity score was calculated prior to surgical treatment for hypercortisolism in each patient using their two most abnormal biochemical test results. A total sum score of 0-3 points was considered mild, 4-6 points moderate, and 7-11 points severe biochemical disease.

**Appendix Table 3.** Typical hydrocortisone taper following surgical remission of hypercortisolism.

| <b>Time after surgery</b>              | <b>Hydrocortisone dose (mg)</b>                 |
|----------------------------------------|-------------------------------------------------|
| Week 1                                 | 30 mg in the morning, 20 mg 6 hours later daily |
| Week 2                                 | 30 mg in the morning, 15 mg 6 hours later daily |
| Week 3                                 | 25 mg in the morning, 15 mg 6 hours later daily |
| Week 4                                 | 20 mg in the morning, 15 mg 6 hours later daily |
| Week 5                                 | 20 mg in the morning, 10 mg 6 hours later daily |
| Week 6                                 | 15 mg in the morning, 10 mg 6 hours later daily |
| Week 7 until recovery of the HPA axis* | 15 mg in the morning, 5 mg 6 hours later daily  |

Abbreviations: HPA axis, hypothalamic-pituitary-adrenal axis.

\*Recovery of the HPA axis was defined as 8 am serum cortisol  $\geq$  10 mcg/dL measured 24 hours after last glucocorticoid dose.

**Appendix Table 4.** Assessment of glucocorticoid withdrawal symptoms based on AddiQoL survey items and patient responses.

| <b>Symptom</b>                  | <b>Corresponding AddiQoL item(s)*</b>                  | <b>Responses counted as present for symptom</b>                 |
|---------------------------------|--------------------------------------------------------|-----------------------------------------------------------------|
| <b>Fatigue</b>                  | Normal daily activities make me tired.                 | “A good bit of the time”, “Most of the time”, “All of the time” |
|                                 | I have to struggle to finish jobs.                     | “A good bit of the time”, “Most of the time”, “All of the time” |
|                                 | I have to push myself to do things.                    | “A good bit of the time”, “Most of the time”, “All of the time” |
|                                 | I feel unwell first thing in the morning.              | “A good bit of the time”, “Most of the time”, “All of the time” |
|                                 | I feel full of energy.                                 | “None of the time”, “A little of the time”                      |
|                                 | I feel physically fit.                                 | “Strongly disagree”, “Disagree”                                 |
|                                 | I can keep going during the day without feeling tired. | “None of the time”, “A little of the time”                      |
|                                 | I feel rested when I wake up in the morning.           | “None of the time”, “A little of the time”                      |
| <b>Sleep disturbance</b>        | I sleep well.                                          | “A good bit of the time”, “Most of the time”, “All of the time” |
| <b>Myalgias and arthralgias</b> | My joints and muscles ache.                            | “A good bit of the time”, “Most of the time”, “All of the time” |
|                                 | I have back pain.                                      | “A good bit of the time”, “Most of the time”, “All of the time” |
| <b>Weakness</b>                 | My legs feel weak.                                     | “A good bit of the time”, “Most of the time”, “All of the time” |

|                                 |                                       |                                                                 |
|---------------------------------|---------------------------------------|-----------------------------------------------------------------|
| <b>Headache</b>                 | I get a headache.                     | “A good bit of the time”, “Most of the time”, “All of the time” |
| <b>Sweating</b>                 | I sweat for no particular reason.     | “A good bit of the time”, “Most of the time”, “All of the time” |
| <b>Nausea</b>                   | I get nauseous.                       | “A good bit of the time”, “Most of the time”, “All of the time” |
| <b>Lightheadedness</b>          | I feel lightheaded.                   | “A good bit of the time”, “Most of the time”, “All of the time” |
| <b>Inability to concentrate</b> | I lose track of what I want to say.   | “A good bit of the time”, “Most of the time”, “All of the time” |
|                                 | I find it difficult to think clearly. | “A good bit of the time”, “Most of the time”, “All of the time” |
|                                 | I can concentrate well.               | “None of the time”, “A little of the time”                      |
| <b>Mood changes</b>             | I worry about my health.              | “A good bit of the time”, “Most of the time”, “All of the time” |
|                                 | I feel low or depressed.              | “A good bit of the time”, “Most of the time”, “All of the time” |
|                                 | I am irritable.                       | “A good bit of the time”, “Most of the time”, “All of the time” |
|                                 | I feel relaxed.                       | “None of the time”, “A little of the time”                      |
|                                 | I am happy.                           | “None of the time”, “A little of the time”                      |
|                                 | I cope well in emotional situations.  | “Strongly disagree”, “Disagree”                                 |

|                                  |                                               |                                                                 |
|----------------------------------|-----------------------------------------------|-----------------------------------------------------------------|
| <b>Limited ability to work</b>   | My ability to work is limited.                | “A good bit of the time”, “Most of the time”, “All of the time” |
|                                  | I get ill more easily than others.            | “A good bit of the time”, “Most of the time”, “All of the time” |
| <b>Predisposition to illness</b> | I take a long time to recover from illnesses. | “A good bit of the time”, “Most of the time”, “All of the time” |
|                                  | I feel good about my health.                  | “None of the time”, “A little of the time”                      |

\*For symptoms with multiple corresponding AddiQoL items (e.g., fatigue), the symptom had to be reported on at least 50% of the corresponding items to be considered present.
